# Supplementary material for: A complete high-quality MinION nanopore assembly of an extensively drug-resistant Mycobacterium tuberculosis Beijing lineage strain identifies novel variation in repetitive PE/PPE gene regions
Source: PubMed Central journal article supplement (PMC6113869; doi:10.1099/mgen.0.000188), 2018-06-15
Supplement: mgen-4-188-s001.pdf [file mgen-4-188-s001.pdf]

1 **Supplementary material**

2 **Fig. S1:** A scheme of workflow to generate variants from Oxford Nanopore technologies (ONT)

3 and Illumina reads

4

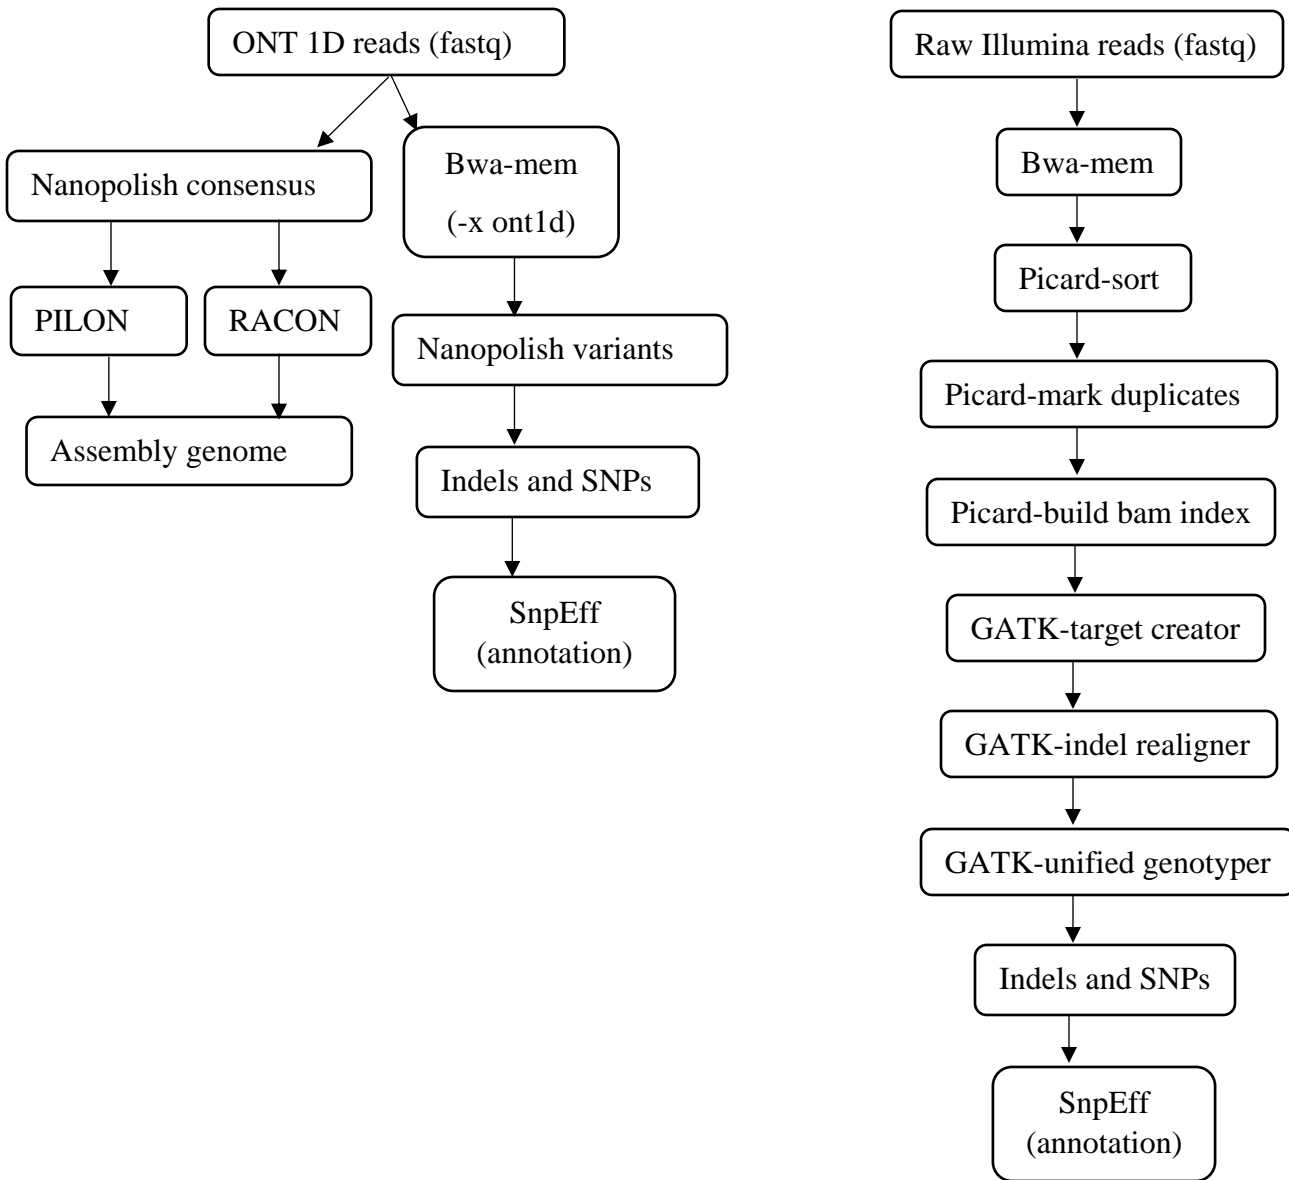

5 **Fig. S2:** Dot plot of sequence accuracy between the draft WP-XDR genome and the reference  
6 genome H37Rv which revealed 99.7% Average Nucleotide Identity (ANI) score. The red dots  
7 show a forward orientation while blue dots show reverse orientation

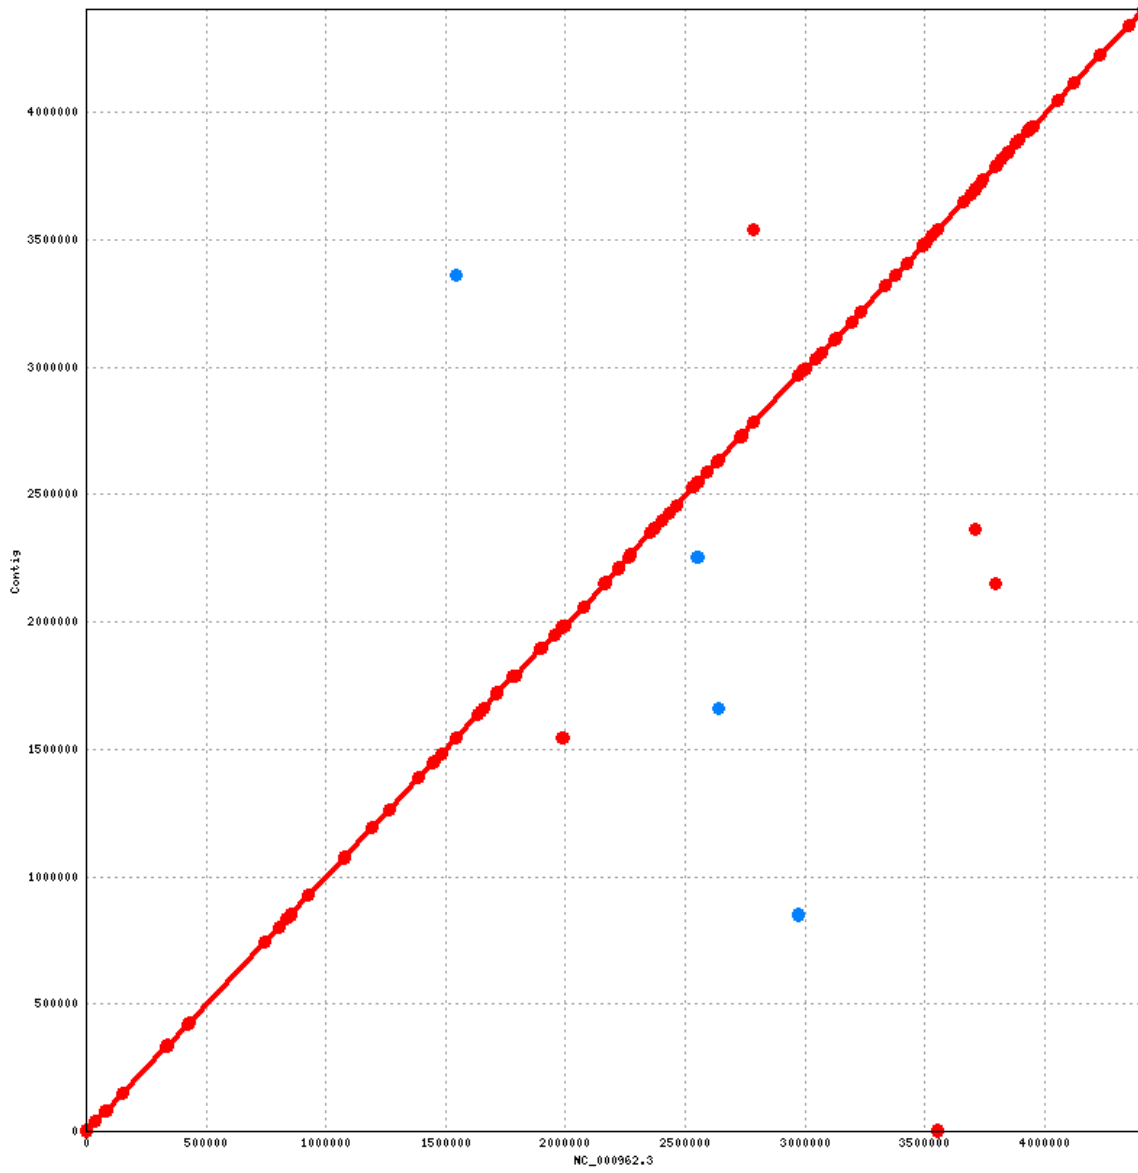

9 **Fig. S3:** Plot of sequence similarity of 168 PE/PPE family genes identified from the assembly  
10 and their sequence and depth coverage from Oxford minion® reads. The marks on the x-axis  
11 represent the different PE/PPE genes while y-axis respects their percentage sequence similarity  
12 from blastn (red), percentage breadth of coverage (black), and read depth (blue). Sample was  
13 sequenced to an average depth of 238X

14

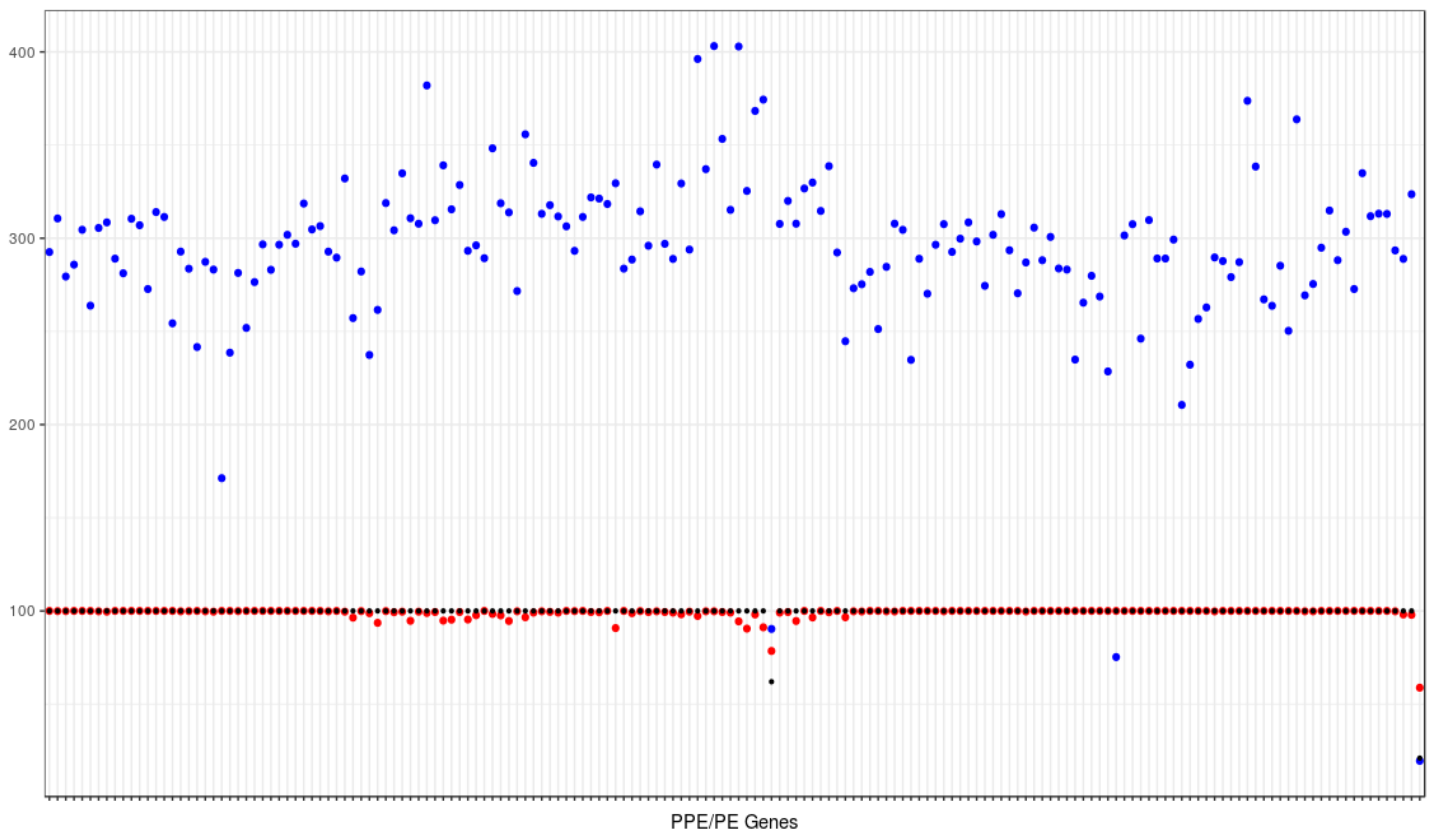

15 **Fig. S4:** Plot of sequence and depth coverage for the assembly of 168 PE/PPE family genes  
16 using Illumina reads. The marks on the x-axis represent the different 168 PE/PPE family genes  
17 while y-axis respective their percentage breadth of coverage (red), and read depth (blue). Sample  
18 was sequenced to average 46.3x depth

19

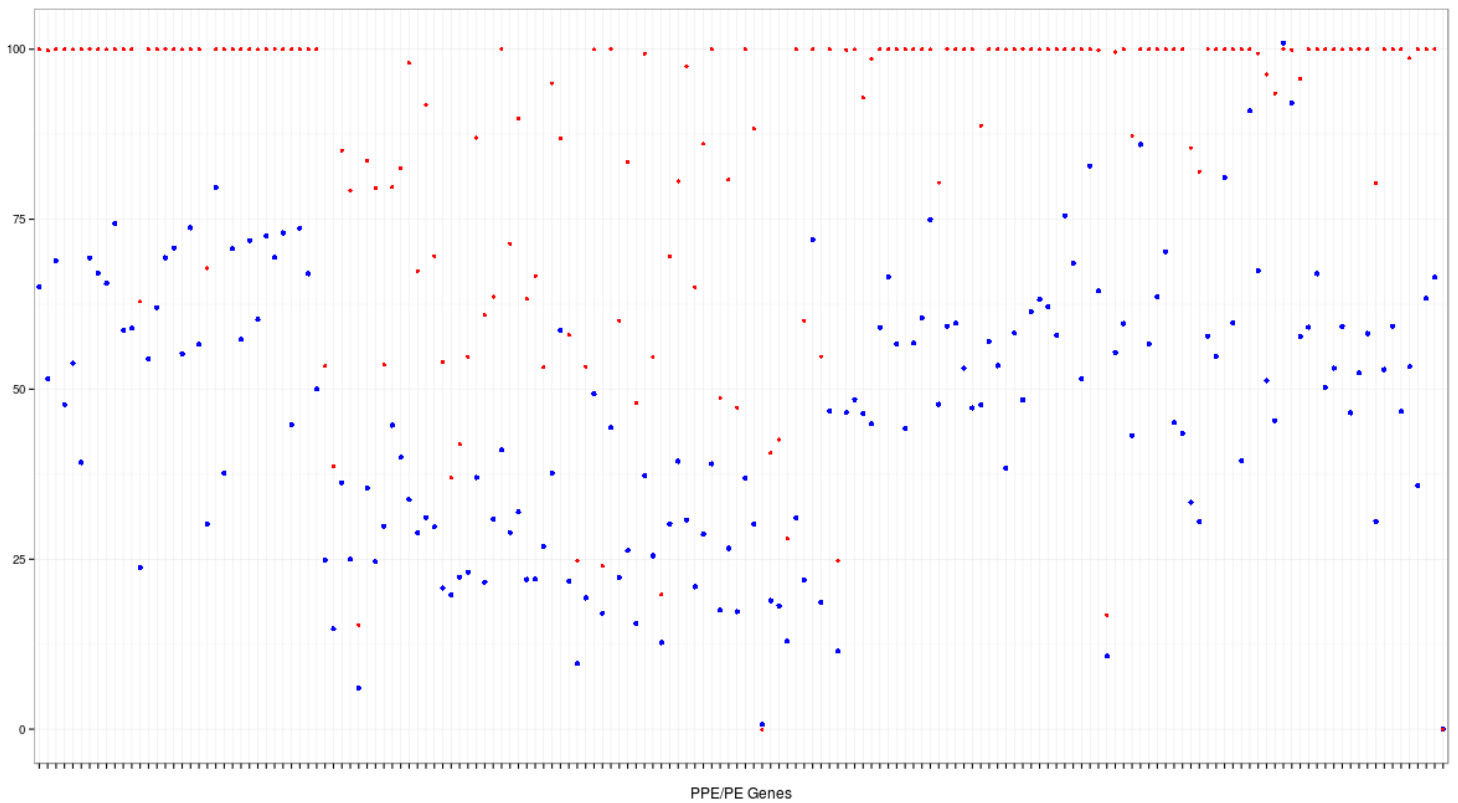

23 **Fig. S5:** Protein structure of the PPE family protein predicted using Phyre2 for a 654bp gene  
24 sequence with an end 323bp insertion identified within the assembled genome but absent in the  
25 reference genome H37Rv.

26

27

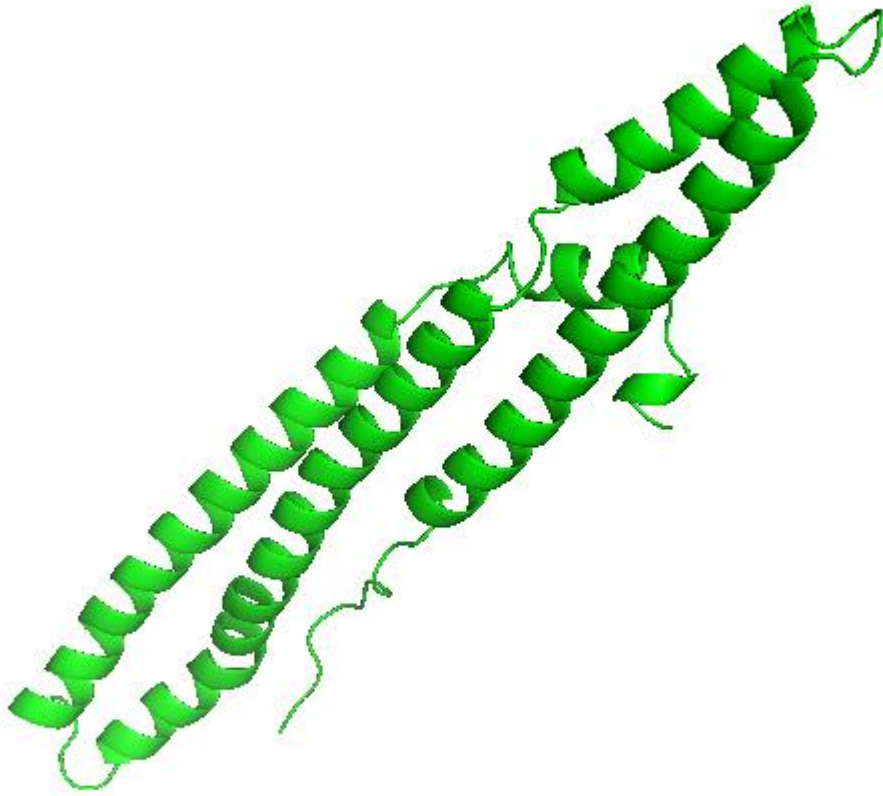

28

29 **Table S1:** List of PE/PPE family genes and their genomic position in H37Rv (NC\_000962.3)

| <b>Locus Number</b> | <b>Gene</b> | <b>Start</b> | <b>End</b> |
|---------------------|-------------|--------------|------------|
| Rv0096              | PPE1        | 105324       | 106715     |
| Rv0109              | PE_PGRS1    | 131382       | 132872     |
| Rv0124              | PE_PGRS2    | 149533       | 150996     |
| Rv0151c             | PE1         | 177543       | 179309     |
| Rv0152c             | PE2         | 179319       | 180896     |
| Rv0159c             | PE3         | 187433       | 188849     |
| Rv0160c             | PE4         | 188931       | 190451     |
| Rv0256c             | PPE2        | 307877       | 309547     |
| Rv0278c             | PE_PGRS3    | 333437       | 336310     |
| Rv0279c             | PE_PGRS4    | 336560       | 339073     |
| Rv0280              | PPE3        | 339364       | 340974     |
| Rv0285              | PE5         | 349624       | 349932     |
| Rv0286              | PPE4        | 349935       | 351476     |
| Rv0297              | PE_PGRS5    | 361334       | 363109     |
| Rv0304c             | PPE5        | 366150       | 372764     |
| Rv0305c             | PPE6        | 372820       | 375711     |
| Rv0335c             | PE6         | 399535       | 400050     |
| Rv0354c             | PPE7        | 424269       | 424694     |
| Rv0355c             | PPE8        | 424777       | 434679     |
| Rv0388c             | PPE9        | 467459       | 468001     |
| Rv0442c             | PPE10       | 530751       | 532214     |
| Rv0453              | PPE11       | 543174       | 544730     |
| Rv0532              | PE_PGRS6    | 622793       | 624577     |
| Rv0578c             | PE_PGRS7    | 671996       | 675916     |
| Rv0742              | PE_PGRS8    | 832981       | 833508     |
| Rv0746              | PE_PGRS9    | 835701       | 838052     |
| Rv0747              | PE_PGRS10   | 838451       | 840856     |
| Rv0754              | PE_PGRS11   | 846159       | 847913     |
| Rv0755c             | PPE12       | 848103       | 850040     |
| Rv0832              | PE_PGRS12   | 924951       | 925364     |
| Rv0833              | PE_PGRS13   | 925361       | 927610     |
| Rv0834c             | PE_PGRS14   | 927837       | 930485     |
| Rv0872c             | PE_PGRS15   | 968424       | 970244     |
| Rv0878c             | PPE13       | 976872       | 978203     |
| Rv0915c             | PPE14       | 1020058      | 1021329    |
| Rv0916c             | PE7         | 1021344      | 1021643    |
| Rv0977              | PE_PGRS16   | 1090373      | 1093144    |
| Rv0978c             | PE_PGRS17   | 1093361      | 1094356    |

|         |           |         |         |
|---------|-----------|---------|---------|
| Rv0980c | PE_PGRS18 | 1095078 | 1096451 |
| Rv1039c | PPE15     | 1161297 | 1162472 |
| Rv1040c | PE8       | 1162549 | 1163376 |
| Rv1067c | PE_PGRS19 | 1188421 | 1190424 |
| Rv1068c | PE_PGRS20 | 1190757 | 1192148 |
| Rv1087  | PE_PGRS21 | 1211560 | 1213863 |
| Rv1088  | PE9       | 1214513 | 1214947 |
| Rv1089  | PE10      | 1214769 | 1215131 |
| Rv1091  | PE_PGRS22 | 1216469 | 1219030 |
| Rv1135c | PPE16     | 1262272 | 1264128 |
| Rv1168c | PPE17     | 1298764 | 1299804 |
| Rv1169c | lipX      | 1299822 | 1300124 |
| Rv1172c | PE12      | 1301755 | 1302681 |
| Rv1195  | PE13      | 1339003 | 1339302 |
| Rv1196  | PPE18     | 1339349 | 1340524 |
| Rv1214c | PE14      | 1357293 | 1357625 |
| Rv1243c | PE_PGRS23 | 1384989 | 1386677 |
| Rv1325c | PE_PGRS24 | 1488154 | 1489965 |
| Rv1361c | PPE19     | 1532443 | 1533633 |
| Rv1386  | PE15      | 1561464 | 1561772 |
| Rv1387  | PPE20     | 1561769 | 1563388 |
| Rv1396c | PE_PGRS25 | 1572127 | 1573857 |
| Rv1430  | PE16      | 1606386 | 1607972 |
| Rv1441c | PE_PGRS26 | 1618209 | 1619684 |
| Rv1450c | PE_PGRS27 | 1630638 | 1634627 |
| Rv1452c | PE_PGRS28 | 1636004 | 1638229 |
| Rv1468c | PE_PGRS29 | 1655609 | 1656721 |
| Rv1548c | PPE21     | 1751297 | 1753333 |
| Rv1646  | PE17      | 1855764 | 1856696 |
| Rv1651c | PE_PGRS30 | 1862347 | 1865382 |
| Rv1705c | PPE22     | 1931497 | 1932654 |
| Rv1706c | PPE23     | 1932694 | 1933878 |
| Rv1753c | PPE24     | 1981614 | 1984775 |
| Rv1759c | wag22     | 1989833 | 1992577 |
| Rv1768  | PE_PGRS31 | 2000614 | 2002470 |
| Rv1787  | PPE25     | 2025301 | 2026398 |
| Rv1788  | PE18      | 2026477 | 2026776 |
| Rv1789  | PPE26     | 2026790 | 2027971 |
| Rv1790  | PPE27     | 2028425 | 2029477 |
| Rv1791  | PE19      | 2029904 | 2030203 |
| Rv1800  | PPE28     | 2039453 | 2041420 |
| Rv1801  | PPE29     | 2042001 | 2043272 |
| Rv1802  | PPE30     | 2043384 | 2044775 |

|         |           |         |         |
|---------|-----------|---------|---------|
| Rv1803c | PE_PGRS32 | 2044923 | 2046842 |
| Rv1806  | PE20      | 2048072 | 2048371 |
| Rv1807  | PPE31     | 2048398 | 2049597 |
| Rv1808  | PPE32     | 2049921 | 2051150 |
| Rv1809  | PPE33     | 2051282 | 2052688 |
| Rv1818c | PE_PGRS33 | 2061178 | 2062674 |
| Rv1840c | PE_PGRS34 | 2087971 | 2089518 |
| Rv1917c | PPE34     | 2162932 | 2167311 |
| Rv1918c | PPE35     | 2167649 | 2170612 |
| Rv1983  | PE_PGRS35 | 2226244 | 2227920 |
| Rv2098c | PE_PGRS36 | 2356729 | 2358033 |
| Rv2099c | PE21      | 2358033 | 2358206 |
| Rv2107  | PE22      | 2367359 | 2367655 |
| Rv2108  | PPE36     | 2367711 | 2368442 |
| Rv2123  | PPE37     | 2381071 | 2382492 |
| Rv2126c | PE_PGRS37 | 2387202 | 2387972 |
| Rv2162c | PE_PGRS38 | 2423240 | 2424838 |
| Rv2328  | PE23      | 2600731 | 2601879 |
| Rv2340c | PE_PGRS39 | 2617667 | 2618908 |
| Rv2352c | PPE38     | 2632923 | 2634098 |
| Rv2353c | PPE39     | 2634528 | 2635592 |
| Rv2356c | PPE40     | 2637688 | 2639535 |
| Rv2371  | PE_PGRS40 | 2651753 | 2651938 |
| Rv2396  | PE_PGRS41 | 2692799 | 2693884 |
| Rv2408  | PE24      | 2706017 | 2706736 |
| Rv2430c | PPE41     | 2727336 | 2727920 |
| Rv2431c | PE25      | 2727967 | 2728266 |
| Rv2487c | PE_PGRS42 | 2795301 | 2797385 |
| Rv2490c | PE_PGRS43 | 2801254 | 2806236 |
| Rv2519  | PE26      | 2835785 | 2837263 |
| Rv2591  | PE_PGRS44 | 2921551 | 2923182 |
| Rv2608  | PPE42     | 2935046 | 2936788 |
| Rv2615c | PE_PGRS45 | 2943600 | 2944985 |
| Rv2634c | PE_PGRS46 | 2960105 | 2962441 |
| Rv2741  | PE_PGRS47 | 3053914 | 3055491 |
| Rv2768c | PPE43     | 3076894 | 3078078 |
| Rv2769c | PE27      | 3078158 | 3078985 |
| Rv2770c | PPE44     | 3079309 | 3080457 |
| Rv2853  | PE_PGRS48 | 3162268 | 3164115 |
| Rv2892c | PPE45     | 3200794 | 3202020 |
| Rv3018c | PPE46     | 3376939 | 3378243 |
| Rv3018A | PE27A     | 3378329 | 3378415 |
| Rv3021c | PPE47     | 3379376 | 3380452 |



|         |           |         |         |
|---------|-----------|---------|---------|
| Rv3022c | PPE48     | 3380440 | 3380682 |
| Rv3022A | PE29      | 3380679 | 3380993 |
| Rv3097c | lipY      | 3465778 | 3467091 |
| Rv3125c | PPE49     | 3490476 | 3491651 |
| Rv3135  | PPE50     | 3501334 | 3501732 |
| Rv3136  | PPE51     | 3501794 | 3502936 |
| Rv3144c | PPE52     | 3510088 | 3511317 |
| Rv3159c | PPE53     | 3527391 | 3529163 |
| Rv3343c | PPE54     | 3729364 | 3736935 |
| Rv3344c | PE_PGRS49 | 3736984 | 3738438 |
| Rv3345c | PE_PGRS50 | 3738158 | 3742774 |
| Rv3347c | PPE55     | 3743711 | 3753184 |
| Rv3350c | PPE56     | 3755952 | 3767102 |
| Rv3367  | PE_PGRS51 | 3778568 | 3780334 |
| Rv3388  | PE_PGRS52 | 3801653 | 3803848 |
| Rv3425  | PPE57     | 3842239 | 3842769 |
| Rv3426  | PPE58     | 3843036 | 3843734 |
| Rv3429  | PPE59     | 3847165 | 3847701 |
| Rv3477  | PE31      | 3894093 | 3894389 |
| Rv3478  | PPE60     | 3894426 | 3895607 |
| Rv3507  | PE_PGRS53 | 3926569 | 3930714 |
| Rv3508  | PE_PGRS54 | 3931005 | 3936710 |
| Rv3511  | PE_PGRS55 | 3939617 | 3941761 |
| Rv3512  | PE_PGRS56 | 3941724 | 3944963 |
| Rv3514  | PE_PGRS57 | 3945794 | 3950263 |
| Rv3532  | PPE61     | 3969343 | 3970563 |
| Rv3533c | PPE62     | 3970705 | 3972453 |
| Rv3539  | PPE63     | 3978059 | 3979498 |
| Rv3558  | PPE64     | 3997980 | 3999638 |
| Rv3590c | PE_PGRS58 | 4031404 | 4033158 |
| Rv3595c | PE_PGRS59 | 4036731 | 4038050 |
| Rv3621c | PPE65     | 4060648 | 4061889 |
| Rv3622c | PE32      | 4061899 | 4062198 |
| Rv3650  | PE33      | 4091233 | 4091517 |
| Rv3652  | PE_PGRS60 | 4093632 | 4093946 |
| Rv3653  | PE_PGRS61 | 4093940 | 4094527 |
| Rv3738c | PPE66     | 4189285 | 4190232 |
| Rv3739c | PPE67     | 4190284 | 4190517 |
| Rv3746c | PE34      | 4196171 | 4196506 |
| Rv3812  | PE_PGRS62 | 4276571 | 4278085 |
| Rv3872  | PE35      | 4350745 | 4351044 |
| Rv3873  | PPE68     | 4351075 | 4352181 |
| Rv3892c | PPE69     | 4374484 | 4375683 |

|         |      |         |         |
|---------|------|---------|---------|
| Rv3893c | PE36 | 4375762 | 4375995 |
|---------|------|---------|---------|

30

31 **Table S2:** Non-consensus SNPs identified from ONT reads mapped to reference H37Rv

32 (159/1254 SNPs)

| SNP  | COUNT | Proportion (%) |
|------|-------|----------------|
| A->C | 6     | 0.48           |
| A->G | 15    | 1.20           |
| T->C | 18    | 1.44           |
| T-G  | 13    | 1.04           |
| C->A | 9     | 0.72           |
| C->T | 19    | 1.52           |
| C->G | 23    | 1.83           |
| G->A | 22    | 1.75           |
| G->T | 20    | 1.59           |
| G->C | 14    | 1.12           |

33

34 **Table S3:** Number of SNPs and average base coverage of PE/PPE family genes identified from

35 ONT and Illumina reads

| PE/PPE genes | ONT | Illumina | Overlap SNPs | Illumina average base coverage | ONT average base coverage |
|--------------|-----|----------|--------------|--------------------------------|---------------------------|
| PPE1         | 1   | 1        | 1            | 46                             | 273                       |
| PE_PGRS1     | 1   | 0        | 0            | 24                             | 332                       |
| PE1          | 1   | 1        | 1            | 65                             | 279                       |
| PE3          | 1   | 1        | 1            | 79                             | 281                       |
| PPE2         | 2   | 2        | 2            | 47                             | 307                       |
| PPE3         | 1   | 2        | 2            | 61                             | 305                       |
| PPE6         | 2   | 2        | 2            | 59                             | 269                       |
| PPE47        | 0   | 14       | 0            | 19                             | 232                       |
| PPE8         | 4   | 4        | 4            | 53                             | 288                       |
| PE_PGRS6     | 3   | 0        | 0            | 12                             | 307                       |
| PE_PGRS7     | 4   | 2        | 2            | 18                             | 338                       |
| PPE9         | 0   | 9        | 0            | 35                             | 323                       |

|           |   |   |   |    |     |
|-----------|---|---|---|----|-----|
| PE_PGRS9  | 2 | 0 | 0 | 11 | 244 |
| PE_PGRS10 | 6 | 4 | 4 | 14 | 257 |
| PE_PGRS13 | 3 | 0 | 0 | 6  | 261 |
| PE_PGRS14 | 1 | 0 | 0 | 35 | 318 |
| PE_PGRS15 | 1 | 0 | 0 | 24 | 304 |
| PE_PGRS17 | 3 | 1 | 1 | 44 | 310 |
| PE_PGRS18 | 4 | 0 | 0 | 39 | 307 |
| PPE16     | 0 | 3 | 0 | 44 | 234 |
| PE8       | 1 | 1 | 1 | 66 | 292 |
| PE_PGRS20 | 4 | 0 | 0 | 31 | 339 |
| PE_PGRS44 | 0 | 2 | 0 | 37 | 339 |
| PE_PGRS21 | 2 | 0 | 0 | 29 | 315 |
| PE_PGRS22 | 5 | 2 | 2 | 20 | 328 |
| PPE17     | 1 | 1 | 1 | 56 | 288 |
| PPE18     | 1 | 0 | 0 | 60 | 270 |
| PE14      | 1 | 1 | 1 | 53 | 305 |
| PPE19     | 2 | 0 | 0 | 74 | 296 |
| PPE20     | 1 | 1 | 1 | 59 | 292 |
| PPE31     | 0 | 1 | 0 | 62 | 313 |
| PE_PGRS25 | 1 | 1 | 1 | 23 | 289 |
| PE16      | 1 | 1 | 1 | 69 | 289 |
| PE_PGRS26 | 1 | 1 | 1 | 37 | 348 |
| PE_PGRS27 | 2 | 0 | 0 | 21 | 318 |
| PE_PGRS28 | 6 | 3 | 3 | 30 | 313 |
| PPE21     | 1 | 0 | 0 | 59 | 299 |
| PPE22     | 1 | 1 | 1 | 53 | 308 |
| PPE24     | 2 | 0 | 0 | 47 | 274 |
| PPE30     | 1 | 0 | 0 | 63 | 288 |
| PE_PGRS32 | 3 | 1 | 1 | 22 | 317 |
| PPE32     | 2 | 0 | 0 | 57 | 283 |
| PPE33     | 2 | 2 | 2 | 75 | 283 |
| PE_PGRS33 | 1 | 0 | 0 | 26 | 311 |
| PPE34     | 2 | 3 | 2 | 68 | 234 |
| PPE35     | 2 | 1 | 1 | 51 | 265 |
| PPE37     | 1 | 0 | 0 | 64 | 268 |
| PE_PGRS37 | 1 | 0 | 0 | 9  | 321 |
| PE23      | 2 | 2 | 2 | 62 | 292 |
| PE24      | 1 | 1 | 1 | 69 | 274 |
| PE_PGRS42 | 1 | 0 | 0 | 26 | 314 |
| PE_PGRS43 | 8 | 0 | 0 | 15 | 295 |
| PE26      | 1 | 1 | 1 | 55 | 287 |
| PE_PGRS47 | 4 | 0 | 0 | 30 | 329 |
| PE27      | 2 | 2 | 2 | 73 | 283 |

|              |            |            |           |    |     |
|--------------|------------|------------|-----------|----|-----|
| PPE44        | 1          | 1          | 1         | 70 | 289 |
| PE_PGRS48    | 3          | 1          | 1         | 39 | 293 |
| lipY         | 2          | 1          | 1         | 66 | 310 |
| PPE51        | 1          | 0          | 0         | 59 | 279 |
| PPE52        | 1          | 0          | 0         | 39 | 287 |
| PPE53        | 1          | 0          | 0         | 90 | 373 |
| PPE54        | 11         | 9          | 9         | 67 | 338 |
| PE_PGRS50    | 1          | 1          | 1         | 28 | 403 |
| PPE55        | 7          | 17         | 7         | 51 | 267 |
| PPE56        | 3          | 3          | 3         | 45 | 263 |
| PPE60        | 2          | 2          | 2         | 66 | 275 |
| PE_PGRS53    | 1          | 0          | 0         | 26 | 402 |
| PE_PGRS54    | 7          | 4          | 4         | 17 | 325 |
| PE_PGRS55    | 1          | 1          | 1         | 36 | 368 |
| PE_PGRS56    | 3          | 6          | 3         | 30 | 374 |
| PE_PGRS58    | 2          | 1          | 1         | 18 | 307 |
| PE_PGRS59    | 1          | 0          | 0         | 18 | 320 |
| PPE66        | 1          | 1          | 1         | 58 | 334 |
| PE35         | 1          | 0          | 0         | 60 | 296 |
| PPE69        | 1          | 1          | 1         | 59 | 313 |
| <b>Total</b> | <b>158</b> | <b>124</b> | <b>81</b> |    |     |

37 **Table S4:** Mutations identified in genes that encode for potential virulence proteins in the WP-

38 XDR strain

39

| <b>Gene</b>    | <b>Nucleotide change</b> | <b>Position</b> | <b>Amino acid</b> |
|----------------|--------------------------|-----------------|-------------------|
| <i>mak</i>     | T->C                     | 154283          | p.Ser18Pro        |
| <i>mce1A</i>   | T->G                     | 199470          | p.Ser313Ala       |
| <i>mce1D</i>   | T->C                     | 203038          | p.Ile188Thr       |
| <i>mce1F</i>   | T->C                     | 206339          | p.Leu370Pro       |
| <i>mce2A</i>   | T->C                     | 686972          | p.Phe51Ser        |
| <i>mce2F</i>   | A->G                     | 694531          | p.Asn432Ser       |
| <i>Rv0634c</i> | A->G                     | 731015          | p.Tyr7His         |
| <i>mazF3</i>   | G->A                     | 1230778         | p.Thr65Ile        |
| <i>ephB</i>    | G->T                     | 2191498         | p.Gly158Trp       |
| <i>mce3A</i>   | G->A                     | 2209465         | p.Ala47Thr        |
| <i>mce3F</i>   | C->A                     | 2216443         | p.Ala396Glu       |
| <i>cstA</i>    | C->A                     | 3428917         | p.Arg559Ser       |
| <i>mce4C</i>   | G->T                     | 3916386         | pArg191Ser        |
| <i>proV</i>    | T->C                     | 4204168         | p.Asn84Asp        |
| <i>proX</i>    | A->G                     | 4205120         | p.Leu85Pro        |
| <i>mycP1</i>   | T->C                     | 4364046         | Thr238Ala         |

40

41 **Table S5:** Mutations in genes involved in cell wall biosynthesis identified in the WP-XDR strain

| <b>Gene</b>   | <b>Position</b> | <b>Mutation</b> |
|---------------|-----------------|-----------------|
| <i>mmpL5</i>  | 776182          | p.Asp767Asn     |
| <i>mmpL12</i> | 1715165         | p.Ile816Met     |
| <i>mmpL10</i> | 1322741         | p.Thr408Ala     |
| <i>fadD6</i>  | 1349733         | p.Glu134Asp     |
| <i>fadE9</i>  | 844023          | p.Asp131Gly     |
| <i>fadD28</i> | 3284640         | p.Thr436Ala     |
| <i>fadD30</i> | 484596          | p.Pro207Leu     |
| <i>fadD34</i> | 37305           | p.Ser16Trp      |
| <i>fadD34</i> | 37334           | p.Thr26Ser      |
| <i>fadD36</i> | 1336164         | p.Pro124Leu     |
| <i>fadD31</i> | 2177366         | p.Arg94Cys      |
| <i>fadE17</i> | 2185674         | p.Ile172Thr     |
| <i>fadE20</i> | 3036826         | p.Val156Met     |
| <i>fadD28</i> | 3284640         | p.Thr436Ala     |
| <i>fadE24</i> | 3505648         | p.Arg96Gly      |
| <i>fadE26</i> | 3922552         | p.Leu218Met     |
| <i>fadD19</i> | 3952308         | p.Asp55Tyr      |
| <i>fadE35</i> | 4252066         | p.Ser328Pro     |
| <i>fadD32</i> | 4262388         | p.Gly227Ser     |
| <i>fadD23</i> | 4301075         | p.Glu422Gln     |
| <i>pks5</i>   | 1722228         | p.Leu2061Arg    |
| <i>pks7</i>   | 1876976         | p.Thr558Lys     |
| <i>pks8</i>   | 1885385         | p.Leu1228Val    |
| <i>pks11</i>  | 1891388         | p.Pro55Ala      |
| <i>pks12</i>  | 2295685         | p.Val3768Leu    |
| <i>pks12</i>  | 2302033         | p.Arg1652Cys    |
| <i>pks13</i>  | 4256210         | p.Ala1646Asp    |

42 **Table S6:** Blast search results of the gene sequence with insertion confirming the uniqueness of  
 43 insertion sequence among lineage 2 genomes

44

| Query Number | Reference genomes | Identification (%) | Identified (bp) | Query coverage (%) | start   | end     | E-value   | Max score |
|--------------|-------------------|--------------------|-----------------|--------------------|---------|---------|-----------|-----------|
| 117001       | CP007027.1        | 100                | 332             | 50                 | 3500716 | 3501047 | 1.11E-175 | 614       |
| 117001       | CP009480.1        | 100                | 332             | 50                 | 3494479 | 3494810 | 1.11E-175 | 614       |
| 117001       | CP003248.2        | 100                | 332             | 50                 | 3501331 | 3501662 | 1.11E-175 | 614       |
| 117001       | AL123456.3        | 100                | 332             | 50                 | 3501334 | 3501665 | 1.11E-175 | 614       |
| 159769       | CP022014.1        | 100                | 654             | 100                | 3502186 | 3502839 | 0.00      | 654       |
| 159769       | AP018036.1        | 100                | 654             | 100                | 3489334 | 3489987 | 0.00      | 654       |
| 159769       | AP018035.1        | 100                | 654             | 100                | 3498189 | 3498842 | 0.00      | 654       |
| 159769       | AP018034.1        | 100                | 654             | 100                | 3486855 | 3487508 | 0.00      | 654       |
| 159769       | CP017920.1        | 100                | 654             | 100                | 4292533 | 4291880 | 0.00      | 654       |
| 159769       | CP013475.1        | 100                | 654             | 100                | 3481453 | 3482106 | 0.00      | 654       |
| 159769       | CP011510.1        | 100                | 654             | 100                | 4254434 | 4253781 | 0.00      | 654       |
| 159769       | CP016888.1        | 100                | 654             | 100                | 3496444 | 3497097 | 0.00      | 654       |
| 159769       | CP012506.2        | 100                | 654             | 100                | 3493237 | 3493890 | 0.00      | 654       |
| 159769       | CP016794.1        | 100                | 654             | 100                | 3493988 | 3494641 | 0.00      | 654       |
| 159769       | CP010968.1        | 100                | 654             | 100                | 3981473 | 3982126 | 0.00      | 654       |
| 159769       | CP010339.1        | 100                | 654             | 100                | 3499781 | 3500434 | 0.00      | 654       |
| 159769       | CP010335.1        | 100                | 654             | 100                | 3493892 | 3494545 | 0.00      | 654       |
| 159769       | CP012090.1        | 100                | 654             | 100                | 917081  | 916428  | 0.00      | 654       |
| 159769       | CP010895.1        | 100                | 654             | 100                | 3955706 | 3956359 | 0.00      | 654       |
| 159769       | CP007299.1        | 100                | 654             | 100                | 3490224 | 3490877 | 0.00      | 654       |
| 159769       | HG813240.1        | 100                | 654             | 100                | 3491900 | 3492553 | 0.00      | 654       |
| 159769       | CP009426.1        | 100                | 654             | 100                | 3470402 | 3471055 | 0.00      | 654       |
| 159769       | CP008983.1        | 100                | 654             | 100                | 518032  | 517379  | 0.00      | 654       |
| 159769       | CP008981.1        | 100                | 654             | 100                | 518033  | 517380  | 0.00      | 654       |
| 159769       | CP008980.1        | 100                | 654             | 100                | 518033  | 517380  | 0.00      | 654       |
| 159769       | CP008979.1        | 100                | 654             | 100                | 518032  | 517379  | 0.00      | 654       |
| 159769       | CP008978.1        | 100                | 654             | 100                | 518033  | 517380  | 0.00      | 654       |
| 159769       | CP008977.1        | 100                | 654             | 100                | 518032  | 517379  | 0.00      | 654       |
| 159769       | CP008976.1        | 100                | 654             | 100                | 518032  | 517379  | 0.00      | 654       |
| 159769       | CP008975.1        | 100                | 654             | 100                | 518032  | 517379  | 0.00      | 654       |
| 159769       | CP008974.1        | 100                | 654             | 100                | 518032  | 517379  | 0.00      | 654       |
| 159769       | CP008973.1        | 100                | 654             | 100                | 518033  | 517380  | 0.00      | 654       |
| 159769       | CP008972.1        | 100                | 654             | 100                | 518033  | 517380  | 0.00      | 654       |
| 159769       | CP008970.1        | 100                | 654             | 100                | 518032  | 517379  | 0.00      | 654       |

|        |            |     |     |     |         |         |      |     |
|--------|------------|-----|-----|-----|---------|---------|------|-----|
| 159769 | CP008969.1 | 100 | 654 | 100 | 518033  | 517380  | 0.00 | 654 |
| 159769 | CP008968.1 | 100 | 654 | 100 | 518032  | 517379  | 0.00 | 654 |
| 159769 | CP008966.1 | 100 | 654 | 100 | 518032  | 517379  | 0.00 | 654 |
| 159769 | CP008964.1 | 100 | 654 | 100 | 518032  | 517379  | 0.00 | 654 |
| 159769 | CP008962.1 | 100 | 654 | 100 | 518033  | 517380  | 0.00 | 654 |
| 159769 | CP008961.1 | 100 | 654 | 100 | 518032  | 517379  | 0.00 | 654 |
| 159769 | CP008960.1 | 100 | 654 | 100 | 518033  | 517380  | 0.00 | 654 |
| 159769 | CP008959.1 | 100 | 654 | 100 | 518033  | 517380  | 0.00 | 654 |
| 159769 | CP007809.1 | 100 | 654 | 100 | 3488153 | 3488806 | 0.00 | 654 |
| 159769 | CP007803.1 | 100 | 654 | 100 | 3478240 | 3478893 | 0.00 | 654 |
| 159769 | CP002885.1 | 100 | 654 | 100 | 3491717 | 3492370 | 0.00 | 654 |
| 159769 | CP002883.1 | 100 | 654 | 100 | 3486486 | 3487139 | 0.00 | 654 |
| 159769 | CP002882.1 | 100 | 654 | 100 | 3480758 | 3481411 | 0.00 | 654 |
| 159769 | CP002871.1 | 100 | 654 | 100 | 3490732 | 3491385 | 0.00 | 654 |
| 159769 | CP002884.1 | 100 | 654 | 100 | 3492943 | 3493596 | 0.00 | 654 |
| 159769 | CP001642.1 | 100 | 654 | 100 | 3486529 | 3487182 | 0.00 | 654 |
| 159769 | CP001641.1 | 100 | 654 | 100 | 3478627 | 3479280 | 0.00 | 654 |
| 159769 | CP017598.1 | 100 | 654 | 100 | 3495720 | 3496373 | 0.00 | 654 |
| 159769 | CP017597.1 | 100 | 654 | 100 | 3522988 | 3523641 | 0.00 | 654 |
| 159769 | CP017596.1 | 100 | 654 | 100 | 3493170 | 3493823 | 0.00 | 654 |
| 159769 | CP017595.1 | 100 | 654 | 100 | 3508711 | 3509364 | 0.00 | 654 |
| 159769 | CP017594.1 | 100 | 654 | 100 | 3519190 | 3519843 | 0.00 | 654 |
| 159769 | CP017593.1 | 100 | 654 | 100 | 3505356 | 3506009 | 0.00 | 654 |
| 159769 | CP010873.1 | 100 | 654 | 100 | 3488175 | 3488828 | 0.00 | 654 |
| 159769 | CP008963.1 | 100 | 654 | 100 | 518033  | 517379  | 0.00 | 654 |
